# Supplementary material for: Active Essential Oils and Their Components in Use against Neglected Diseases and Arboviruses
Source: Hindawi journal article supplement (doi:10.1155/2019/6587150), 2019-02-07
Supplement: f1 [file 6587150.f1.pdf]

## SUPPLEMENTARY MATERIAL

### Active Essential Oils and their Components in Use Against Neglected Diseases and Arboviruses

Emanuela Coutinho Luna<sup>1</sup>, Isadora Silva Luna<sup>1</sup>, Luciana Scotti<sup>2,3</sup>, Alex France M. Monteiro<sup>3</sup>, Marcus Tullius Scotti<sup>3</sup>, Ricardo Olímpio de Moura<sup>1</sup>, Rodrigo Santos Aquino de Araújo<sup>1</sup>, Kadja Luana Chagas Monteiro<sup>4</sup>, Thiago Mendonça de Aquino<sup>5</sup>, Frederico Fávaro Ribeiro<sup>1</sup>, Francisco Jaime Bezerra Mendonça Junior<sup>1</sup>

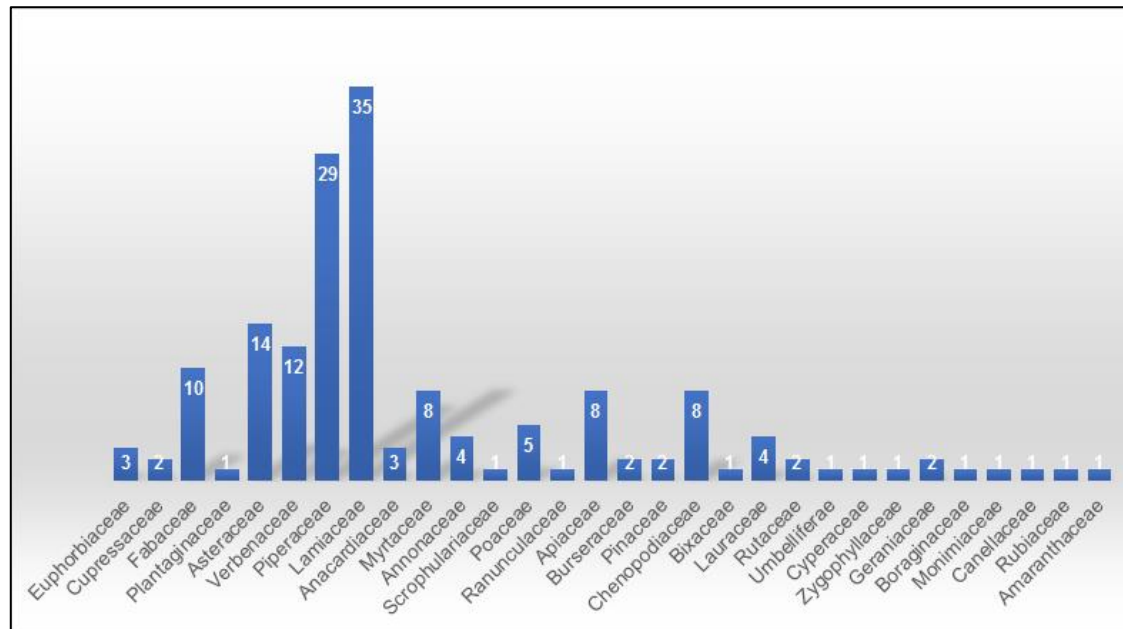

FIGURE S1: Plant families and number of OEs evaluated between the years 2000 and 2018 against at least one species of *Leishmania*.

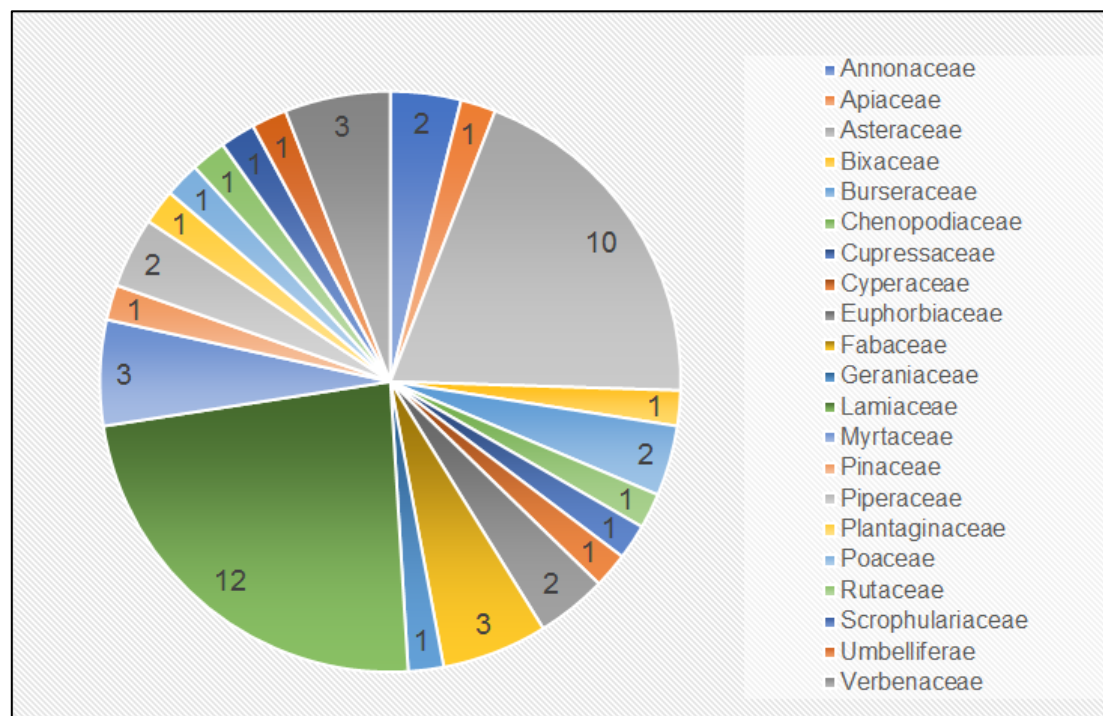

FIGURE S2: Plant families and the number of active EOs ( $IC_{50} \leq 10 \mu\text{g/mL}$ ) against at least one *Leishmania* species and parasite form.

**Table S1.** Inactive or moderated active EOs against *Leishmania* species.

| Plant family   | Plant specie                  | Plant origin                                                          | Part of plant | Major Constituents (%)                                                               | Activity (IC <sub>50</sub> )/ <i>Leishmania</i> specie (evolutive form)                       | SI                                                            | Ref.  |
|----------------|-------------------------------|-----------------------------------------------------------------------|---------------|--------------------------------------------------------------------------------------|-----------------------------------------------------------------------------------------------|---------------------------------------------------------------|-------|
| Lauraceae      | <i>Litsea cubeba</i>          | QUINARI<br>Cosmetic and<br>Fragrances Inc.<br>(Maringá-Pr,<br>Brazil) | Fruits        | nd                                                                                   | nd                                                                                            | nd                                                            | [147] |
|                | <i>Cinnamomum camphora</i>    |                                                                       | Barks         | nd                                                                                   | >500.0 µg/mL/ <i>L. amazonensis</i> (promastigote)                                            | nd                                                            | [147] |
|                | <i>Licaria canella</i>        | Brazil/Amazonas<br>State                                              | Leaves        | Benzyl benzoate (69.7%)                                                              | 19.0 µg/mL/ <i>L. amazonensis</i> (promastigote)                                              | nd                                                            | [237] |
|                | <i>Aniba canelilla</i>        |                                                                       |               | 1-Nitro-2-phenylethane (88.9%)                                                       | 40.0 µg/mL/ <i>L. amazonensis</i> (promastigote)                                              | nd                                                            | [237] |
|                | <i>Laurus nobilis</i>         | Northen Tunisia                                                       | Aerial parts  | 1,8-Cineole (43.35%)                                                                 | 13.24 µg/mL/ <i>L. infantum</i> (promastigote)<br>24.36 µg/mL/ <i>L. major</i> (promastigote) | 28.73 for <i>L. infantum</i> and<br>15.61 for <i>L. major</i> | [261] |
| Zingiberaceae  | <i>Elettaria cardamomum</i>   | QUINARI<br>Cosmetic and<br>Fragrances Inc.<br>(Maringá-Pr,<br>Brazil) | Seeds         | nd                                                                                   | >500.0 µg/mL/ <i>L. amazonensis</i> (promastigote)                                            | nd                                                            | [147] |
| Zygophyllaceae | <i>Bulnesia sarmientoi</i>    |                                                                       | Barks         | Guaiol (48.29%)<br>2-Undecanone (19.49%)<br>1,8-Cineole (8.71%)                      | 85.56 µg/mL/ <i>L. amazonensis</i> (promastigote)                                             | 1.91                                                          | [147] |
| Apiaceae       | <i>Ferula galbaniflua</i>     |                                                                       | Resin         | Methyl 8-pimaren-18-oate (41.82%)<br>β-Pinene (17.34%)<br>Diethyl phthalate (13.09%) | 95.70 µg/mL/ <i>L. amazonensis</i> (promastigote)                                             | 3.94                                                          | [147] |
|                | <i>Foeniculum officinalis</i> |                                                                       | Leaves        | nd                                                                                   | 328.28 µg/mL/ <i>L. amazonensis</i> (promastigote)                                            | 1.12                                                          | [147] |

|              |                               |                                                                       |                     |                                                                                        |                                                                                                   |      |       |
|--------------|-------------------------------|-----------------------------------------------------------------------|---------------------|----------------------------------------------------------------------------------------|---------------------------------------------------------------------------------------------------|------|-------|
|              | <i>Coriandrum sativum</i>     | Brazil/Ceará State                                                    | Seeds               | $\beta$ -Linalool (73.21%)<br>Camphor (4.25%)<br>$\alpha$ -Pinene (4.20%)              | 181.0 $\mu\text{g/mL/L. chagasi}$ (promastigote)<br>1.51 $\mu\text{g/mL/L. chagasi}$ (amastigote) | nd   | [239] |
| Geraniaceae  | <i>Pelargonium graveolens</i> | QUINARI<br>Cosmetic and<br>Fragrances Inc.<br>(Maringá-Pr,<br>Brazil) | Leaves and<br>stems | nd                                                                                     | 363.71 $\mu\text{g/mL/L. amazonensis}$ (promastigote)                                             | 1.01 | [147] |
| Boraginaceae | <i>Cordia verbenaceae</i>     |                                                                       | Leaves              | nd                                                                                     | 64.75 $\mu\text{g/mL/L. amazonensis}$ (promastigote)                                              | 2.01 | [147] |
| Monimiaceae  | <i>Siparuna guianensis</i>    | Brazil/Lavras                                                         |                     | Bicyclogermancrene (16.71%)<br>$\beta$ -Myrcene (13.14%)<br>Germancrene-D (8.68%)      | 48.55 $\mu\text{g/mL/L. amazonensis}$ (promastigote)                                              | 1.60 | [147] |
| Canellaceae  | <i>Cinnamodendron dinisii</i> |                                                                       |                     | $\alpha$ -Pinene (35.41%)<br>$\beta$ -Pinene (17.81%)<br>Sabinense (12.01%)            | 54.05 $\mu\text{g/mL/L. amazonensis}$ (promastigote)                                              | 2.23 | [147] |
| Fabaceae     | <i>Copaifera reticulata</i>   | Brazil/Acre State                                                     | Trunks              | $\alpha$ -Copaene (25.1%)<br>$\beta$ -Caryophyllene (13.1%)<br>Copalic acid (7.7%)     | 22.0 $\mu\text{g/mL/L. amazonensis}$ (promastigote)                                               | nd   | [156] |
|              | <i>Copaifera martii</i>       | Brazil/Pará State                                                     |                     | Kovalenic acid (29.0%)<br>$\beta$ -Bisabolene (10.7%)<br>Kaurenoic acid (7.9%)         | 14.0 $\mu\text{g/mL/L. amazonensis}$ (promastigote)                                               | nd   | [156] |
|              | <i>Copaifera cearenses</i>    | Brazil/Minas Gerais State                                             |                     | $\beta$ -Caryophyllene (19.7%)<br>$\alpha$ -Copaene (8.2%)<br>Hardwickiic acid (6.2%)  | 18.0 $\mu\text{g/mL/L. amazonensis}$ (promastigote)                                               | nd   | [156] |
|              | <i>Copaifera paupera</i>      | Brazil/Acre State                                                     |                     | $\beta$ -Bisabolene (20.2%)<br>$\alpha$ -Zingiberene (19.4%)<br>Kaurenoic acid (13.3%) | 11.0 $\mu\text{g/mL/L. amazonensis}$ (promastigote)                                               | nd   | [156] |
|              | <i>Copaifera langsdorfii</i>  | Brazil/São Paulo State                                                |                     | Kaurenoic acid (44.3%)<br>$\beta$ -Caryophyllene (32.8%)<br>Hardwickiic acid (8.2%)    | 20.0 $\mu\text{g/mL/L. amazonensis}$ (promastigote)                                               | nd   | [156] |

|    |                                                   |                                                           |       |                                                                                                               |                                                                            |      |       |
|----|---------------------------------------------------|-----------------------------------------------------------|-------|---------------------------------------------------------------------------------------------------------------|----------------------------------------------------------------------------|------|-------|
|    | <i>Copaifera officinalis</i>                      | Brazil/Roraima State                                      |       | Hardwickiic acid (30.7%)<br>Copalic acid (13.9%)<br>$\beta$ -Caryophyllene (8.5%)                             | 20.0 $\mu\text{g/mL}$ / <i>L. amazonensis</i> (promastigote)               | nd   | [156] |
|    | <i>Copaifera lucens</i>                           | Brazil/Rio de Janeiro State                               |       | Polyalthic acid (69.8%)<br>Copalic acid (11.1%)                                                               | 20.0 $\mu\text{g/mL}$ / <i>L. amazonensis</i> (promastigote)               | nd   | [156] |
|    | <i>Myroxylon peruiferum</i> (Fabaceae)            | QUINARI Cosmetic and Fragrances Inc. (Maringá-Pr, Brazil) | Barks | $\alpha$ -copaene (13.41%)<br>Guaiol (9.35%)<br>Safrole (8.35%)                                               | 162.25 $\mu\text{g/mL}$ / <i>L. amazonensis</i> (promastigote)             | 0.99 | [147] |
| nd | <i>Copaifera</i> ssp. (C2) commercial oil         | Brazil/Acre State                                         | nd    | Daniellic acid (33.65%)<br><i>trans</i> - $\beta$ -Caryophyllene (12.83%)<br>$\beta$ -Bisabolene (12.65%)     | nd                                                                         | nd   | [160] |
| nd | <i>Copaifera</i> ssp. (C3) commercial oil         |                                                           | nd    | $\alpha$ -Copaene (36.46%)<br>Kaurenoic acid (10.10%)<br>Hardwickiic acid (9.00%)                             | nd                                                                         | nd   | [160] |
| nd | <i>Copaifera</i> ssp. sesquiterpene-rich fraction |                                                           | nd    | <i>trans</i> - $\beta$ -Caryophyllene (42.36%)<br>$\alpha$ -Copaene (11.22%)<br>$\alpha$ -Bergamotene (9.11%) | nd                                                                         | nd   | [160] |
| nd | <i>Copaifera</i> ssp. Diterpene-rich fraction     |                                                           | nd    | Copalic acid (49.87%)<br>Acetoxy-copalic acid (19.56%)<br>Hydroxy-copalic acid (9.39%)                        | nd                                                                         | nd   | [160] |
| nd | <i>Tea tree</i> commercial oil                    | nd                                                        | nd    | nd                                                                                                            | ED <sub>50</sub> = 403.0 $\mu\text{g/mL}$ / <i>L. major</i> (promastigote) | 0.1  | [240] |
| nd | <i>Clove</i> commercial oil                       | nd                                                        | nd    | nd                                                                                                            | ED <sub>50</sub> = 58.4 $\mu\text{g/mL}$ / <i>L. major</i> (promastigote)  | 0.6  | [240] |
| nd | <i>Kanuka</i> commercial oil                      | nd                                                        | nd    | nd                                                                                                            | ED <sub>50</sub> = 26.2 $\mu\text{g/mL}$ / <i>L. major</i> (promastigote)  | 0.6  | [240] |

|            |                                              |                                                                       |         |                                                                                                        |                                                                   |                                                               |       |
|------------|----------------------------------------------|-----------------------------------------------------------------------|---------|--------------------------------------------------------------------------------------------------------|-------------------------------------------------------------------|---------------------------------------------------------------|-------|
| nd         | <i>Manuka</i><br>commercial oil              | nd                                                                    | nd      | nd                                                                                                     | ED <sub>50</sub> = 208.1 µg/mL/ <i>L. major</i><br>(promastigote) | 1.2                                                           | [240] |
| nd         | <i>Anise</i><br>commercial oil               | nd                                                                    | nd      | nd                                                                                                     | ED <sub>50</sub> = 286.1 µg/mL/ <i>L. major</i><br>(promastigote) | 1.1                                                           | [240] |
| nd         | <i>Dwarf pine</i><br>commercial oil          | nd                                                                    | nd      | nd                                                                                                     | ED <sub>50</sub> = 111.8 µg/mL/ <i>L. major</i><br>(promastigote) | 0.2                                                           | [240] |
| nd         | <i>Pine</i><br>commercial oil                | nd                                                                    | nd      | nd                                                                                                     | ED <sub>50</sub> = 123.2 µg/mL/ <i>L. major</i><br>(promastigote) | 1.2                                                           | [240] |
| nd         | <i>Spruce</i><br>commercial oil              | nd                                                                    | nd      | nd                                                                                                     | ED <sub>50</sub> = 29.9 µg/mL/ <i>L. major</i><br>(promastigote)  | 8.8                                                           | [240] |
| nd         | <i>Balmmint</i><br>commercial oil            | nd                                                                    | nd      | nd                                                                                                     | ED <sub>50</sub> = 7.0 µg/mL/ <i>L. major</i><br>(promastigote)   | 3.6                                                           | [240] |
| nd         | <i>Peppermint</i><br>commercial oil          | nd                                                                    | nd      | nd                                                                                                     | ED <sub>50</sub> = 227.0 µg/mL/ <i>L. major</i><br>(promastigote) | 0.9                                                           | [240] |
| nd         | <i>Rosemary</i><br>commercial oil            | nd                                                                    | nd      | nd                                                                                                     | ED <sub>50</sub> = 282.1 µg/mL/ <i>L. major</i><br>(promastigote) | 0.3                                                           | [240] |
| nd         | <i>Thyme</i><br>commercial oil               | nd                                                                    | nd      | nd                                                                                                     | ED <sub>50</sub> = 127.4 µg/mL/ <i>L. major</i><br>(promastigote) | 0.2                                                           | [240] |
| Asteraceae | <i>Matricaria chamomilla</i><br>(Asteraceae) | QUINARI<br>Cosmetic and<br>Fragrances Inc.<br>(Maringá-Pr,<br>Brazil) | Flowers | ( <i>E</i> )-β-Farnesene (52.73%)<br>Bisabolol oxide B (12.09%)<br>( <i>E,E</i> )-α-Farnesene (10.34%) | 60.16 µg/mL/ <i>L. amazonensis</i> (promastigote)                 | 2.87                                                          | [147] |
|            | <i>Artemisia abyssinica</i>                  | Inchini/Addis<br>Abada                                                | Leaves  | Yomogi alcohol (38.47%)<br>Artemisyl acetate (24.88%)<br>Artemisia alcohol (6.70%)                     | 312.5 µg/mL/ <i>L. donovani</i><br>(promastigote)                 | 2.7 for <i>L. donovani</i> and 28<br>for <i>L. aethiopica</i> | [162] |

|            |                                      |                                                                       |              |                                                                                      |                                                                                                                                                                  |    |       |
|------------|--------------------------------------|-----------------------------------------------------------------------|--------------|--------------------------------------------------------------------------------------|------------------------------------------------------------------------------------------------------------------------------------------------------------------|----|-------|
|            |                                      |                                                                       |              |                                                                                      | 76.5 µg/mL/ <i>L. aethiopica</i> (promastigote)<br>131.00 µg/mL/ <i>L. donovani</i> (axenic amastigote)<br>12.44 µg/mL/ <i>L. aethiopica</i> (axenic amastigote) |    |       |
|            | <i>Artemisia abrotanum</i>           | Cuba                                                                  | Aerial parts | nd                                                                                   | MIC = 116.5 mg/mL/ <i>L. amazonensis</i> (promastigote)                                                                                                          | nd | [241] |
|            | <i>Pluchea carolinensis</i>          |                                                                       | Leaves       | selin-11-en-4 $\alpha$ -ol (51.0%)                                                   | 24.7 µg/mL/ <i>L. amazonensis</i> (promastigote)<br>6.2 µg/mL/ <i>L. amazonensis</i> (amastigote)                                                                | 5  | [242] |
|            | <i>Baccharis dracunculifolia</i> DC. | Brazil/ São Paulo                                                     | Aerial parts | $\alpha$ -muurolol (4.66%)<br>spathulenol (16.24%)<br>nerolidol (33.51%)             | 42.0 µg/mL/ <i>L. donovani</i> (promastigote)                                                                                                                    | nd | [243] |
|            | <i>Crithmum maritimum</i>            | nd                                                                    |              | $\gamma$ -terpinene (48.7%)<br>dillapiole (13.8%)                                    | 122.0 µg/mL/ <i>L. infantum</i> (promastigote)                                                                                                                   | nd | [244] |
|            | <i>Distichoselinum tenuifolium</i>   | nd                                                                    |              | Myrcene (84.6%)                                                                      | 295.0 µg/mL/ <i>L. infantum</i> (promastigote)                                                                                                                   | nd | [244] |
|            | <i>Eryngium maritimum</i>            | nd                                                                    |              | Germacrene D (41.1%)                                                                 | 205.0 µg/mL/ <i>L. infantum</i> (promastigote)                                                                                                                   | nd | [244] |
|            | <i>Seseli tortuosum</i>              | nd                                                                    |              | $\alpha$ -Pinene (27.4%)<br>$\beta$ -pinene (16.0%)<br>Limonene (10.0%)              | 133.0 µg/mL/ <i>L. infantum</i> (promastigote)                                                                                                                   | nd | [244] |
| Annonaceae | <i>Cananga odorata</i>               | QUINARI<br>Cosmetic and<br>Fragrances Inc.<br>(Maringá-Pr,<br>Brazil) | Flowers      | nd                                                                                   | nd                                                                                                                                                               | nd | [147] |
|            | <i>Annona coriacea</i> Mart.         | Brazil/São Paulo<br>State                                             | Leaves       | Bicyclogermacrene (39.8%)<br>$\gamma$ -Muurolene (7.9%)<br>$\delta$ -Cadinene (6.0%) | 160.20 µg/mL/ <i>L. amazonensis</i> (promastigote)<br>261.20 µg/mL/ <i>L. braziliensis</i> (promastigote)                                                        | nd | [245] |

|           |                                  |                                                                       |                              |                                                                               |                                                                                                                        |                                                                         |       |
|-----------|----------------------------------|-----------------------------------------------------------------------|------------------------------|-------------------------------------------------------------------------------|------------------------------------------------------------------------------------------------------------------------|-------------------------------------------------------------------------|-------|
|           |                                  |                                                                       |                              |                                                                               | 39.93 µg/mL/ <i>L. chagasi</i><br>(promastigote)<br>305.20 µg/mL/ <i>L. major</i><br>(promastigote)                    |                                                                         |       |
| Lamiaceae | <i>Lavandula officinalis</i>     | QUINARI<br>Cosmetic and<br>Fragrances Inc.<br>(Maringá-Pr,<br>Brazil) | Flowers                      | -                                                                             | >500.0 µg/mL/ <i>L. amazonensis</i> (promastigote)                                                                     | nd                                                                      | [147] |
|           | <i>Salvia sclarea</i>            |                                                                       | Leaves                       | Linalyl acetate (60.08%)<br>Linalool (28.80%)                                 | 325.92 µg/mL/ <i>L. amazonensis</i> (promastigote)                                                                     | 1.15                                                                    | [147] |
|           | <i>Melissa officinalis</i>       |                                                                       |                              | Geranial (52.02%)<br>Neral (37.18%)                                           | 132.02 µg/mL/ <i>L. amazonensis</i> (promastigote)                                                                     | 2.25                                                                    | [147] |
|           | <i>Ocimum basilicum</i>          | German                                                                | Stems, leaves<br>and flowers | (-)-Linalool (30.7%)<br>(+)- $\delta$ -Cadinene (3.43%)<br>Eucalyptol (2.66%) | 48.3 µg/mL/ <i>L. amazonensis</i><br>(promastigote)                                                                    | nd                                                                      | [262] |
|           | <i>Ocimum basilicum</i>          | Mesten                                                                |                              | (-)-Linalool (30.7%)<br>Eugenol (9.68%)                                       | 49.6 µg/mL/ <i>L. donovani</i><br>(promastigote)                                                                       | nd                                                                      | [262] |
|           | <i>Ocimum sanctum</i>            | Mississippi                                                           |                              | Eugenol (18.0%)<br>Methylchavicol (14.7%)<br>Eucalyptol (5.45%)               | 37.7 µg/mL/ <i>L. donovani</i><br>(promastigote)                                                                       | nd                                                                      | [262] |
|           | Basil Bulgaria<br>commercial oil | nd                                                                    | nd                           | (-)-Linalool (37.1%)<br>Eucalyptol (2.97%)                                    | 40.0 µg/mL/ <i>L. donovani</i><br>(promastigote)                                                                       | nd                                                                      | [262] |
|           | Basil sweet<br>commercial oil    | nd                                                                    | nd                           | (-)-Bornyl acetate<br>Methylchavicol (71.3%)                                  | 50.0 µg/mL/ <i>L. donovani</i><br>(promastigote)                                                                       | nd                                                                      | [262] |
|           | <i>Ocimum canum</i>              | Brazil/Maranhão<br>State                                              | Leaves                       | Thymol (42.15%)<br><i>p</i> -Cymene (21.17%)<br>$\gamma$ -Terpinene (19.81%)  | 17.4 µg/mL/ <i>L. amazonensis</i><br>(promastigote)<br>13.1 µg/mL/ <i>L. amazonensis</i><br>(intracellular amastigote) | 18.1 for<br>promastigote and<br>24.0 for<br>intracellular<br>amastigote | [163] |
|           | <i>Ocimum gratissimum</i> L.     | Brazil/ Teresina,<br>Piauí                                            | Leaves                       | Eugenol (40%)<br>1,8-Cineole (24%)                                            | 75.0 µg/mL/ <i>L. chagasi</i><br>(promastigote)                                                                        | nd                                                                      | [246] |
|           | <i>Lavandula stoechas</i>        | Morocco/<br>Province of<br>Quezzane                                   | Aerial parts                 | nd                                                                            | >10.0 µg/mL/ <i>L. tropica</i><br>(promastigote)                                                                       | nd                                                                      | [175] |



|  |                                          |                  |              |                                                                    |                                                                                               |                                                               |       |
|--|------------------------------------------|------------------|--------------|--------------------------------------------------------------------|-----------------------------------------------------------------------------------------------|---------------------------------------------------------------|-------|
|  | <i>Rosmarinus officinalis</i>            | Northern Tunisia |              | 1,8-Cineole (43.77%)                                               | 16.34 µg/mL/ <i>L. infantum</i> (promastigote)<br>20.92 µg/mL/ <i>L. major</i> (promastigote) | 15.35 for <i>L. infantum</i> and<br>11.99 for <i>L. major</i> | [178] |
|  | <i>Lavandula viridis</i>                 | nd               | Leaves       | α-Pinene (9.2%)<br>1,8-Cineole (29.7%)<br>Camphor (10.0%)          | 263.0 µg/mL/ <i>L. infantum</i> (promastigote)                                                | nd                                                            | [244] |
|  | <i>Mentha cervine</i>                    | nd               | Aerial parts | Limonene (5.4%),<br>Isomenthone (10.6%)<br>Pulegone (74.8%)        | 178.0 µg/mL/ <i>L. infantum</i> (promastigote)                                                | nd                                                            | [244] |
|  | <i>Mentha x piperita</i>                 | nd               |              | Menthone (9.8%)<br>Menthofuran (10.9%)<br>Menthol (44.0%)          | 198.0 µg/mL/ <i>L. infantum</i> (promastigote)                                                | nd                                                            | [244] |
|  | <i>Origanum virens</i>                   | nd               |              | <i>p</i> -Cymene (7.4%)<br>γ-Terpinene (7.9%)<br>Carvacrol (68.2%) | 196.0 µg/mL/ <i>L. infantum</i> (promastigote)                                                | nd                                                            | [244] |
|  | <i>Rosmarinus officinalis</i>            | nd               |              | Myrcene (32.0%)<br>1,8-Cineole (13.7%)<br>Camphor (11.9%)          | nd                                                                                            | nd                                                            | [244] |
|  | <i>Thymbra capitata</i>                  | nd               |              | <i>p</i> -Cymene (5.5%)<br>Carvacrol (74.6%)                       | 130.0 µg/mL/ <i>L. infantum</i> (promastigote)                                                | nd                                                            | [244] |
|  | <i>Thymus capitatus</i>                  | nd               |              | Camphene (6.5%)<br>1,8-Cineole (58.6%)<br>Borneol (10.0%)          | 37.0 µg/mL/ <i>L. infantum</i> (promastigote)                                                 | nd                                                            | [244] |
|  | <i>Thymus mastichina</i>                 | nd               |              | 1,8-Cineole (64.6%)                                                | 133.0 µg/mL/ <i>L. infantum</i> (promastigote)                                                | nd                                                            | [244] |
|  | <i>Thymus zygis</i> (chemotype geraniol) | nd               |              | Geraniol (33.1%)<br>Geranyl acetate (44.5%)                        | 162.0 µg/mL/ <i>L. infantum</i> (promastigote)                                                | nd                                                            | [244] |
|  | <i>Thymus zygis</i> (chemotype thymol)   | nd               |              | <i>p</i> -Cymene (36.6%)<br>γ-Terpinene (21.0%)<br>Thymol (15.2%)  | 293.0 µg/mL/ <i>L. infantum</i> (promastigote)                                                | nd                                                            | [244] |

|            |                                                  |                             |              |                                                                             |                                                                                                                                                                           |                                                                                         |       |
|------------|--------------------------------------------------|-----------------------------|--------------|-----------------------------------------------------------------------------|---------------------------------------------------------------------------------------------------------------------------------------------------------------------------|-----------------------------------------------------------------------------------------|-------|
|            | <i>Thymus capitellatus</i>                       | Portugal                    |              | 1,8-Cineole (58.6%)<br>Borneol (10.1%)                                      | 37.0 µg/mL/ <i>L. infantum</i> (promastigote)<br>35.0 µg/mL/ <i>L. tropica</i> (promastigote)<br>62.0 µg/mL/ <i>L. major</i> (promastigote)                               | nd                                                                                      | [247] |
| Myrtaceae  | <i>Syzygium cumini</i> (L.) Skeels               | São Luís State/Brazil       | Leaves       | α-Pinene (31.85%)<br>(Z)-β-Ocimene (28.98%)<br>(E)-β-Ocimene (11.71%)       | 60.0 µg/mL/ <i>L. amazonensis</i> (promastigote)<br>43.9 µg/mL/ <i>L. amazonensis</i> (axenic amastigote)<br>38.1 µg/mL/ <i>L. amazonensis</i> (intracellular amastigote) | 10.2 for promastigote, 13.9 for axenic amastigote and 16.1 for intracellular amastigote | [173] |
|            | <i>Syzygium cumini</i> (L.) SKEELS               | Brazil/ São Luiz (Maranhão) | Leaves       | α-Pinene (31.85%)<br>(Z)-β-Ocimene (28.98%)<br>(E)- β-Ocimene (11.71%)      | 36.0 mg.L <sup>-1</sup> / <i>L. amazonensis</i> (promastigote)                                                                                                            | nd                                                                                      | [248] |
|            | <i>Eucalyptus globulus</i>                       | Northern Tunisia            | Aerial parts | 1,8-cineole (42.31%)                                                        | 16.28 µg/mL/ <i>L. infantum</i> (promastigote)<br>18.30 µg/mL/ <i>L. major</i> (promastigote)                                                                             | 19.04 for <i>L. infantum</i> and 16.94 for <i>L. major</i>                              | [178] |
|            | <i>Syzygium aromaticum</i> (L.) (commercial oil) | nd                          | Buds         | Eugenol (85.3%)<br>α-Humulene (6.8%)                                        | 220.0 µg/mL/ <i>L. infantum</i> (promastigote)                                                                                                                            | nd                                                                                      | [244] |
| Piperaceae | <i>Piper rivinoides</i> Kunth                    | Brazil/ Paraná (Antonina)   | Leaves       | α-Humulene (10.0%)<br>Bicyclogermacrene (11.8%)<br>(Z)-α-Bisabolene (10.9%) | 10.9 µg/mL/ <i>L. amazonensis</i> (promastigote)<br>>200.0 µg/mL/ <i>L. amazonensis</i> (axenic amastigote)                                                               | nd                                                                                      | [249] |

|  |                                             |                                |  |                                                                                               |                                                                                                                         |                                |       |
|--|---------------------------------------------|--------------------------------|--|-----------------------------------------------------------------------------------------------|-------------------------------------------------------------------------------------------------------------------------|--------------------------------|-------|
|  | <i>Piper mosenii</i><br>C. DC.              | Brazil/ Paraná<br>(Antonina)   |  | (E)-Caryophyllene (8.6%)<br>$\alpha$ -Humulene (11.3%)<br>Caryophyllene oxide<br>(12.1%)      | 17.4 $\mu\text{g/mL/L. amazonensis}$<br>(promastigote)<br>>200.0 $\mu\text{g/mL/L. amazonensis}$<br>(axenic amastigote) | nd                             | [249] |
|  | <i>Piper cernuum</i><br>Vell.               | Brazil/ Paraná<br>(Antonina)   |  | $\alpha$ -Pinene (11.4%)<br>$\beta$ -Elemene (10.1%)<br>Spathuleol (11.5%)                    | 27.1 $\mu\text{g/mL/L. amazonensis}$<br>(promastigote)<br>>200.0 $\mu\text{g/mL/L. amazonensis}$<br>(axenic amastigote) | nd                             | [249] |
|  | <i>Piper diospyrifolium</i><br>Kunth        | Brazil/ Paraná<br>(Antonina)   |  | (E)-Caryophyllene (7.4%)<br>$\gamma$ -Gurjunene (6.9%)<br>Selin-11-en-4- $\alpha$ -ol (17.7%) | 13.5 $\mu\text{g/mL/L. amazonensis}$<br>(promastigote)<br>76.1 $\mu\text{g/mL/L. amazonensis}$<br>(axenic amastigote)   | 2.35 for axenic<br>amastigote  | [249] |
|  | <i>Piper arboretum</i><br>Aubl.             | Brazil/ Paraná<br>(Antonina)   |  | Spathulenol (7.9%)<br>Caryophyllene oxide (5.9%)<br>1-epi-Cubenol (10.4%)                     | 15.2 $\mu\text{g/mL/L. amazonensis}$<br>(promastigote)<br>>200.0 $\mu\text{g/mL/L. amazonensis}$<br>(axenic amastigote) | nd                             | [249] |
|  | <i>Piper aduncum</i><br>L.                  | Brazil/ Paraná<br>(Cerro Azul) |  | (E)- $\beta$ -Ocimene (13.9%)<br>Safrole (6.2%)<br>Bicyclogermacrene (20.9%)                  | 25.9 $\mu\text{g/mL/L. amazonensis}$<br>(promastigote)<br>36.2 $\mu\text{g/mL/L. amazonensis}$<br>(axenic amastigote)   | >5.52 for axenic<br>amastigote | [249] |
|  | <i>Piper gaudichaudianum</i><br>Kunth       | Brazil/ Paraná<br>(Antonina)   |  | $\delta$ -3-Carene (5.9%)<br>$\gamma$ -Elemene (5.4%)<br>$\delta$ -Cadinene (45.3%)           | 93.5 $\mu\text{g/mL/L. amazonensis}$<br>(promastigote)                                                                  | nd                             | [249] |
|  | <i>Piper xylosteoides</i><br>(Kunth) Steud. | Brazil/Paraná<br>State         |  | $\alpha$ -Thujene (7.9%)<br>$\beta$ -Phellandrene (22.6%)<br>(E)-Nerolidol (8.5%)             | >100.0 $\mu\text{g/mL/L. amazonensis}$<br>(promastigote)                                                                | nd                             | [249] |

|  |                                             |                             |              |                                                                                              |                                                                                                                                       |                                                                                           |       |
|--|---------------------------------------------|-----------------------------|--------------|----------------------------------------------------------------------------------------------|---------------------------------------------------------------------------------------------------------------------------------------|-------------------------------------------------------------------------------------------|-------|
|  | <i>Piper mikanianum</i><br>(Kunth) Steudel  | Brazil/Santa Catarina State |              | $\alpha$ -Thujene (6.0%)<br>Safrole (72.4%)                                                  | >100.0 $\mu\text{g/mL/L. amazonensis}$<br>(promastigote)                                                                              | nd                                                                                        | [249] |
|  | <i>Piper rivinoides</i><br>Kunth            | Brazil/Paraná State         |              | $\alpha$ -Humulene (10.0%)<br>Bicyclogermacrene (11.8%)<br>(Z)- $\alpha$ -Bisabolene (10.9%) | 10.9 $\mu\text{g/mL/L. amazonensis}$<br>(promastigote)<br>>200.0 $\mu\text{g/mL/L. amazonensis}$<br>(axenic amastigote)               | nd                                                                                        | [249] |
|  | <i>Piper aduncum</i>                        | Brazil/Minas Gerais State   |              | Nerolidol (25.22%)<br>Linalool (13.42%)                                                      | 77.9 $\mu\text{g/mL/L. braziliensis}$<br>(promastigote)                                                                               | 1.12 for promatigotes<br>(macrophages) and<br>>6.42 for promastigote (red<br>blood cells) | [250] |
|  | <i>Piper cubeba</i><br>(commercial oil)     | nd                          | Fruits       | Sabinene (19.99%)<br>Eucalyptol(11.87%)<br>4-Terpineol (6.36%)                               | 326.5 $\mu\text{g/mL/L. amazonensis}$<br>(promastigote)                                                                               | nd                                                                                        | [251] |
|  | <i>Piper auritum</i>                        | Cuba                        | Aerial parts | nd                                                                                           | 490.7 mg/mL/L.<br><i>amazonensis</i><br>(promastigote)                                                                                | nd                                                                                        | [241] |
|  | <i>Piper aduncum</i>                        |                             |              | nd                                                                                           | 50.8 mg/mL/L. <i>amazonensis</i><br>(promastigote)                                                                                    | nd                                                                                        | [241] |
|  | <i>Piper aduncum</i><br>var. <i>ossanum</i> | Cuba/Bauta                  | Leaves       | Camphene (7.41%)<br>Piperitone (20.07%)<br>Viridiflorol (12.97%)                             | 32.5 $\mu\text{g/mL/L. infantum}$<br>(intracellular amastigote)<br>19.3 $\mu\text{g/mL/L. amazonensis}$<br>(intracellular amastigote) | nd                                                                                        | [252] |

|  |                                                                          |                             |              |                                                                                       |                                                                                                                                  |    |       |
|--|--------------------------------------------------------------------------|-----------------------------|--------------|---------------------------------------------------------------------------------------|----------------------------------------------------------------------------------------------------------------------------------|----|-------|
|  | <i>Piper aduncum</i><br>var. <i>ossanum</i>                              | Cuba/Ceiba                  |              | Camphor (9.41%)<br>Piperitone (19.01%)<br>Viridiflorol<br>(18.80%)                    | 32.5 µg/mL/ <i>L. infantum</i><br>(intracellular amastigote)<br>>64.0 µg/mL/ <i>L. amazonensis</i><br>(intracellular amastigote) | nd | [252] |
|  | <i>Piper auritum</i><br>Kunth                                            | Colombia/Valle<br>del Cauca | Aerial parts | Safrole (91.3%)<br>Myristicin (4.8%)                                                  | >100.0 µg/mL/ <i>L. infantum</i><br>(promastigote)<br>>100.0 µg/mL/ <i>L. infantum</i><br>(amastigote)                           | nd | [253] |
|  | <i>Piper bredemeyeri</i>                                                 | Colombia/Cesar              | Aerial parts | α-Pinene (20.3%)<br>β-Pinene (32.3%)<br>Limonene (4.1%)                               | >100.0 µg/mL/ <i>L. infantum</i><br>(promastigote)<br>>100.0 µg/mL/ <i>L. infantum</i><br>(amastigote)                           | nd | [253] |
|  | <i>Piper bogotense</i>                                                   | Colombia/Nariño             |              | α-Pinene (20.3%)<br>β-Pinene (32.3%)<br><i>trans</i> -β-Caryophyllene<br>(6.3%)       | >100.0 µg/mL/ <i>L. infantum</i><br>(promastigote)<br>>100.0 µg/mL/ <i>L. infantum</i><br>(amastigote)                           | nd | [253] |
|  | <i>Piper marginatum</i>                                                  | Colombia/Tolima             |              | α-Phellandrene (11.2%)<br>Limonene (7.6%)<br><i>trans</i> -β-Caryophyllene<br>(11.1%) | 88.70 µg/mL/ <i>L. infantum</i><br>(promastigote)<br>>100.0 µg/mL/ <i>L. infantum</i><br>(amastigote)                            | nd | [253] |
|  | <i>Piper cf divaricatum</i>                                              |                             |              | α-Pinene (11.4%)<br>1,8-Cineole (18.3%)<br>Linalool (15.0%)                           | 73.29 µg/mL/ <i>L. infantum</i><br>(promastigote)<br>>100.0 µg/mL/ <i>L. infantum</i><br>(amastigote)                            | nd | [253] |
|  | <i>Piper cf. brachypodon</i><br>var. <i>hirsuticaule</i><br><i>Yunck</i> | Colombia/Chocó              |              | β-Elemene (6.4%)<br><i>trans</i> -β-Caryophyllene<br>(9.8%)<br>Germacrene D (16.7%)   | 93.60 µg/mL/ <i>L. infantum</i><br>(promastigote)<br>>100.0 µg/mL/ <i>L. infantum</i><br>(amastigote)                            | nd | [253] |

|  |                                                 |         |              |                                                                                                                   |                                                                                                                                                           |                                                                                             |       |
|--|-------------------------------------------------|---------|--------------|-------------------------------------------------------------------------------------------------------------------|-----------------------------------------------------------------------------------------------------------------------------------------------------------|---------------------------------------------------------------------------------------------|-------|
|  | <i>Piper obrutum</i>                            |         |              | Linalool (15.8%)<br>β-Elemene (7.6%)<br>α-Humulene (6.4%)                                                         | 35.87 µg/mL/ <i>L. infantum</i><br>(promastigote)<br>89.02 µg/mL/ <i>L. infantum</i><br>(amastigote)                                                      | >1.12                                                                                       | [253] |
|  | <i>Piper septuplinervium</i>                    |         |              | epi-Cubebol (9.0%)<br>δ-Cadinene (10.9%)<br>Viridiflorol (7.9%)                                                   | 30.05 µg/mL/ <i>L. infantum</i><br>(promastigote)<br>64.80 µg/mL/ <i>L. infantum</i><br>(amastigote)                                                      | 1.54                                                                                        | [253] |
|  | <i>Piper lanceifolium</i>                       |         |              | <i>trans</i> -β-Caryophyllene (11.6%)<br>Germacrene D (10.7%)<br>β-Selinene (7.8%)                                | 37.81 µg/mL/ <i>L. infantum</i><br>(promastigote)<br>>100.0 µg/mL/ <i>L. infantum</i><br>(amastigote)                                                     | nd                                                                                          | [253] |
|  | <i>Piper brachypodom</i>                        |         |              | <i>trans</i> -β-Caryophyllene (20.2%)<br>9-epi- <i>trans</i> -Caryophyllene (5.8%)<br>Caryophyllene oxide (10.8%) | 23.43 µg/mL/ <i>L. infantum</i><br>(promastigote)<br>>100.0 µg/mL/ <i>L. infantum</i><br>(amastigote)                                                     | 2.83                                                                                        | [253] |
|  | <i>Piper var brachypodon</i><br>(Benth.) C. DC. |         |              | <i>trans</i> -β-Caryophyllene (20.2%)<br>Bicyclogermacrene (8.5%)<br>Caryophyllene oxide (10.7%)                  | 23.68 µg/mL/ <i>L. infantum</i><br>(promastigote)<br>>100.0 µg/mL/ <i>L. infantum</i><br>(amastigote)                                                     | 2.65                                                                                        | [253] |
|  | <i>Piper clausenianum</i>                       | Castelo | Fresh Leaves | ( <i>E</i> )-Nerodiol (81.41%)<br>Linalool (5.20%)<br>γ-Murolene (1.09%)                                          | nd                                                                                                                                                        | nd                                                                                          | [254] |
|  | <i>Piper auritum</i>                            | Cuba    | Aerial parts | Safrole (86.91%)                                                                                                  | 29.1 µg/mL/ <i>L. major</i><br>(promastigote)<br>63.3 µg/mL/ <i>L. mexicana</i><br>(promastigote)<br>52.1 µg/mL/ <i>L. braziliensis</i><br>(promastigote) | 4.0 for <i>L. major</i> ,<br>2.0 for <i>L. mexicana</i> ,<br>2.0 for <i>L. braziliensis</i> | [255] |

|             |                            |                           |              |                                                                                              |                                                       |                                |       |
|-------------|----------------------------|---------------------------|--------------|----------------------------------------------------------------------------------------------|-------------------------------------------------------|--------------------------------|-------|
|             |                            |                           |              |                                                                                              | 12.8 µg/mL/ <i>L. donovani</i><br>(promastigote)      | and 8.0 for <i>L. donovani</i> |       |
| Verbenaceae | <i>Lantana camara</i><br>L | Brazil/Ceará State        | Leaves       | ( <i>E</i> )-Caryophyllene (23.75%)<br>Bicyclgermacrene<br>(15.80%)<br>Germacrene D (11.73%) | 72.31 µg/mL/ <i>L. braziliensis</i><br>(promastigote) | nd                             | [255] |
|             | <i>Lippia alba</i>         | Santander/Bucara<br>manga | Aerial parts | Carvone (31.8%)<br>Limonene (29%)<br>Bicyclosquiphellandrene<br>(11.3%)                      | >100.0 µg/mL/ <i>L. chagasi</i><br>(promastigote)     | nd                             | [194] |
|             | <i>Lippia alba</i>         | Boyacá/Cubará             |              | Carvone (49.4%)<br>Limonene (31.9%)                                                          | >100.0 µg/mL/ <i>L. chagasi</i><br>(promastigote)     | nd                             | [194] |
|             | <i>Lippia alba</i>         | Santander/Bucara<br>manga |              | Carvone (49.6%)<br>Limonene (28.8%)                                                          | >100.0 µg/mL/ <i>L. chagasi</i><br>(promastigote)     | nd                             | [194] |
|             | <i>Lippia alba</i>         | Cundinamarca/Ca<br>chipai |              | Carvone (47.6%)<br>Limonene (10.8%)                                                          | >100.0 µg/mL/ <i>L. chagasi</i><br>(promastigote)     | nd                             | [194] |
|             | <i>Lippia alba</i>         | Cundinamarca,<br>Anolaima |              | Carvone (25.6%)<br>Limonene (18.2%)                                                          | >100.0 µg/mL/ <i>L. chagasi</i><br>(promastigote)     | nd                             | [194] |
|             | <i>Lippia alba</i>         | Tolima/Flandes            |              | Carvone (48.3%)<br>Limonene (19.1%)                                                          | >100.0 µg/mL/ <i>L. chagasi</i><br>(promastigote)     | nd                             | [194] |

|  |                           |                       |  |                                                                                     |                                                          |    |       |
|--|---------------------------|-----------------------|--|-------------------------------------------------------------------------------------|----------------------------------------------------------|----|-------|
|  | <i>Lippia alba</i>        | Boívar/Colorado       |  | Limonene (3.2%)<br><i>trans</i> - $\beta$ -Caryophyllene (7.3%)<br>Geranial (28.9%) | 79.5 $\mu\text{g/mL}$ / <i>L. chagasi</i> (promastigote) | nd | [194] |
|  | <i>Lippia alba</i>        | Santander/Bucaramanga |  | <i>trans</i> - $\beta$ -Caryophyllene (6.6%)<br>Geranial (23.3%)                    | 18.9 $\mu\text{g/mL}$ / <i>L. chagasi</i> (promastigote) | nd | [194] |
|  | <i>Lippia alba</i>        | Bolívar/Turbaco       |  | Limonene (3.2%)<br><i>trans</i> - $\beta$ -Caryophyllene (5.5%)<br>Geranial (26.7%) | 91.5 $\mu\text{g/mL}$ / <i>L. chagasi</i> (promastigote) | nd | [194] |
|  | <i>Lippia citriodora</i>  | Quindío/Armenia       |  | Limonene (10.7%)<br>Neral (15.6%)<br>Geranial (18.9%)                               | 77.9 $\mu\text{g/mL}$ / <i>L. chagasi</i> (promastigote) | nd | [194] |
|  | <i>Lippia micromera</i>   | Cesar/Manaure         |  | <i>p</i> -Cymene (13.1%)<br>Methyl thymyl ether (14.9%)<br>Thymol (29.1%)           | 51.8 $\mu\text{g/mL}$ / <i>L. chagasi</i> (promastigote) | nd | [194] |
|  | <i>Lippia origanoides</i> | Santander/Piedecuesta |  | <i>p</i> -Cymene (12.0%)<br>Carvacrol (46.2%)<br>$\gamma$ -Terpinene (9.5%)         | 13.7 $\mu\text{g/mL}$ / <i>L. chagasi</i> (promastigote) | nd | [194] |
|  | <i>Lippia origanoides</i> | Santander/Jordán Sube |  | <i>p</i> -Cymene (13.9%)<br>Thymol (9.2%)<br>Carvacrol (36.5%)                      | 63.2 $\mu\text{g/mL}$ / <i>L. chagasi</i> (promastigote) | nd | [194] |



|  |                              |                       |              |                                                                                                               |                                                                                                                 |                                               |       |
|--|------------------------------|-----------------------|--------------|---------------------------------------------------------------------------------------------------------------|-----------------------------------------------------------------------------------------------------------------|-----------------------------------------------|-------|
|  | <i>Lippia origanoides</i>    |                       |              | <i>p</i> -Cymene (15.7%)<br><i>trans</i> - $\beta$ -caryophyllene (9.4%)                                      | >100.0 $\mu\text{g/mL/L. chagasi}$<br>(promastigote)                                                            | nd                                            | [194] |
|  | <i>Lippia origanoides</i>    | Santander/Bucaramanga |              | Thymol (15.1%)<br>Carvacrol (38.8%)<br>$\gamma$ -Terpinene (12.6%)                                            | 16.0 $\mu\text{g/mL/L. chagasi}$<br>(promastigote)                                                              | nd                                            | [194] |
|  | <i>Lippia origanoides</i>    | Santander/Los Santos  |              | <i>p</i> -Cymene (11.2%)<br><i>trans</i> - $\beta$ -Caryophyllene (11.3%)                                     | >100.0 $\mu\text{g/mL/L. chagasi}$<br>(promastigote)                                                            | nd                                            | [194] |
|  | <i>Lippia dulcis</i>         | Santander/Bucaramanga |              | $\alpha$ -Copaene (8.4%)<br><i>trans</i> - $\beta$ -Caryophyllene (10.4%)<br>$\alpha$ -Bisabolol (8.2%)       | 37.1 $\mu\text{g/mL/L. chagasi}$<br>(promastigote)                                                              | nd                                            | [194] |
|  | <i>Lippia sidoides</i>       | Brazil/Sergipe State  | Leaves       | <i>p</i> -Cymene (34.1%; 17.8)<br>Thymol (38.7%; 6.0)<br>Carvacrol (0.6% 43.7%)<br>(Due different accessions) | 74.1 and 54.8 $\mu\text{g/mL/L. chagasi}$<br>(promastigote)<br>(Due different accessions)                       | nd                                            | [256] |
|  | <i>Lippia sidoides</i>       |                       | Aerial parts | Thymol (78.37%)<br><i>p</i> -cymene (6.32%)                                                                   | 44.38 $\mu\text{g/mL/L. amazonensis}$<br>(promastigote)<br>34.4 $\mu\text{g/mL/L. amazonensis}$<br>(amastigote) | 4.91 for promastigote and 6.32 for amastigote | [238] |
|  | <i>Lippia gracilis</i>       |                       | Leaves       | Thymol (61.84%)<br>Carvacrol (48.92%)<br>(Two different genotypes)                                            | 86.32 and 77.26 $\mu\text{g/mL/L. chagasi}$<br>(promastigote)<br>(Two different genotypes)                      | nd                                            | [208] |
|  | <i>Lippia sidoides</i> Cham. | Brazil/Piauí State    |              | Thymol (68.3%)<br><i>p</i> -Cymene (14.4%)                                                                    | 89.0 $\mu\text{g/mL/L. chagasi}$<br>(promastigote)                                                              | nd                                            | [246] |

|               |                                                  |                           |                 |                                                                                  |                                                                                                                                                                                                                          |                                                               |       |
|---------------|--------------------------------------------------|---------------------------|-----------------|----------------------------------------------------------------------------------|--------------------------------------------------------------------------------------------------------------------------------------------------------------------------------------------------------------------------|---------------------------------------------------------------|-------|
|               | <i>Lippia sidoides</i><br>comercial oil          | nd                        | nd              | Thymol (59.65%)<br>$\beta$ -Caryophyllene (10.60%)                               | 19.76 $\mu\text{g/mL}$ / <i>L. chagasi</i><br>(promastigote)<br>5.07 $\mu\text{g/mL}$ / <i>L. chagasi</i><br>(amastigote)                                                                                                | nd                                                            | [239] |
|               | <i>Lippia graveolens</i>                         | nd                        | Aerial parts    | <i>p</i> -Cymene (16.9%)<br>1,8-Cineole (6.6%)<br>Thymol (19.8%)                 | 171.0 $\mu\text{g/mL}$ / <i>L. infantum</i><br>(promastigote)                                                                                                                                                            | nd                                                            | [244] |
| Anacardiaceae | <i>Myracrodruon urundeuva</i><br>(Engl.) Fr. All | Brazil/Piauí State        | Leaves          | $\beta$ -Myrcene (42.46%)<br>$\alpha$ -Myrcene (37.23%)<br>Caryophyllene (4.28%) | 205.0 $\mu\text{g/mL}$ / <i>L. amazonensis</i><br>(promastigote)<br>104.6 $\mu\text{g/mL}$ / <i>L. amazonensis</i><br>(axenic amastigote)<br>44.5 $\mu\text{g/mL}$ / <i>L. amazonensis</i><br>(intracellular amastigote) | 12.3 for<br>intracellular<br>amastigote                       | [257] |
|               |                                                  | Brazil/Pernambuco State   | Latex of fruits | $\beta$ -Pinene (40.7%)<br>Terpinolene (28.3%)<br>$\alpha$ -Pinene (11.5%)       | 39.1 $\mu\text{g/mL}$ / <i>L. amazonensis</i><br>(promastigote)                                                                                                                                                          | 3.7                                                           | [258] |
|               | <i>Mangifera indica</i> var.<br>Espada           |                           | Latex of fruits | Terpinolene (73.6 %)<br>$\delta$ -3-Carene (5.7%)                                | 23.0 $\mu\text{g/mL}$ / <i>L. amazonensis</i><br>(promastigote)                                                                                                                                                          | 6.9                                                           | [258] |
| Ranunculaceae | <i>Nigella sativa</i>                            | Northen Tunisia           | Aerial parts    | <i>p</i> -Cymene (53.1%)                                                         | 10.68 $\mu\text{g/mL}$ / <i>L. infantum</i><br>(promastigote)<br>13.25 $\mu\text{g/mL}$ / <i>L. major</i><br>(promastigote)                                                                                              | 20.67 for <i>L. infantum</i> and<br>16.66 for <i>L. major</i> | [178] |
| Rubiaceae     | <i>Mitracarpus frigidus</i>                      | Brazil/Minas Gerais State |                 | Linalool (29.9%)<br>Eugenol acetate (15.85%)<br>5-Hydroxy-isobornyl<br>(8.41%)   | 47.2 $\mu\text{g/mL}$ / <i>L. major</i><br>(promastigote)<br>89.7 $\mu\text{g/mL}$ / <i>L. amazonensis</i><br>(promastigote)                                                                                             | nd                                                            | [259] |

|               |                                        |                    |         |                                                     |                                                                                                                                                                                              |                                                                                         |       |
|---------------|----------------------------------------|--------------------|---------|-----------------------------------------------------|----------------------------------------------------------------------------------------------------------------------------------------------------------------------------------------------|-----------------------------------------------------------------------------------------|-------|
| Amaranthaceae | <i>Chenopodium ambrosioides</i>        | Cuba               |         | nd                                                  | MIC= 27.8 mg/mL/ <i>L. amazonensis</i> (promastigote)                                                                                                                                        | nd                                                                                      | [241] |
| Pinaceae      | <i>Pinus caribaea</i>                  | Pinar del Río      |         | nd                                                  | MIC = 0.16 mg/mL/ <i>L. amazonensis</i> (promastigote)                                                                                                                                       | nd                                                                                      | [241] |
| Poaceae       | <i>Cymbopogon citratus</i>             | Angola/Luanda      |         | Geranial (48.4%)<br>Neral (32.6%)<br>Myrcene (6.4%) | 25.0 µg/mL/ <i>L. infantum</i> (promastigote)<br>52.0 µg/mL/ <i>L. tropica</i> (promastigote)<br>38.0 µg/mL/ <i>L. tropica</i> (promastigote)                                                | nd                                                                                      | [260] |
|               | <i>Cymbopogon citratus</i>             | nd                 |         | Myrcene (6.4%)<br>Neral (32.6%)<br>Geranial (48.4%) | 25.0 µg/mL/ <i>L. infantum</i> (promastigote)                                                                                                                                                | nd                                                                                      | [244] |
|               | <i>Cymbopogon citratus</i> (DC) Stapf. | Brazil/Piaui State | Leaves  | Geranial (41.1%)<br>Neral (40.4%)                   | 45.0 µg/mL/ <i>L. chagasi</i> (promastigote)                                                                                                                                                 | nd                                                                                      | [246] |
| Cupressaceae  | <i>Juniperus oxycedrus</i>             | nd                 | Berries | α-Pinene (56.4%)                                    | 51.0 µg/mL/ <i>L. infantum</i> (promastigote)                                                                                                                                                | nd                                                                                      | [244] |
|               | <i>Juniperus oxycedrus</i>             | nd                 | Leaves  | α-Pinene (76.4 %)                                   | 127.0 µg/mL/ <i>L. infantum</i> (promastigote)                                                                                                                                               | nd                                                                                      | [244] |
| Euphorbiaceae | <i>Croton leptostachyus</i>            | Alvarado/Tolima    | Leaves  | nd                                                  | 84.59 µg/mL/ <i>L. panamensis</i> (amastigote)<br>7.39 µg/mL/ <i>L. panamensis</i> (promastigote)<br>36.74 µg/mL/ <i>L. braziliensis</i> (amastigote)<br>22.74 µg/mL/ <i>L. braziliensis</i> | 0.2 for <i>L. panamensis</i> amastigote,<br>2.24 for <i>L. panamensis</i> promastigote, | [204] |

|  |  |  |  |  |                |                                                                                                      |  |
|--|--|--|--|--|----------------|------------------------------------------------------------------------------------------------------|--|
|  |  |  |  |  | (promastigote) | 0.45 for <i>L. braziliensis</i><br>Amastigote and<br>0.73 for <i>L. braziliensis</i><br>promastigote |  |
|--|--|--|--|--|----------------|------------------------------------------------------------------------------------------------------|--|

## REFERENCES – SUPPLEMENTARY MATERIAL

- [147] M. A. Andrade, C. D. Azevedo, F. N. Motta, et al., “Essential oils: In vitro activity against *Leishmania amazonensis*, cytotoxicity and chemical composition”, *BMC Complement. Altern. Med.*, vol. 16, no. 1, pp. 1–8, 2016.
- [156] A. O. Santos, T. Ueda-Nakamura, B. P. Dias Filho, V. F. Veiga Junior, A. C. Pinto, and C. V. Nakamura, “Effect of Brazilian copaiba oils on *Leishmania amazonensis*”, *J. Ethnopharmacol.*, vol. 120, no. 2, pp. 204–208, 2008.
- [160] D. C. Soares, N. A. Portella, M. F. D. S. Ramos, A. C. Siani, and E. M. Saraiva, “Trans- $\beta$ -caryophyllene: An effective antileishmanial compound found in commercial copaiba Oil (*Copaifera* spp.)”, *Evidence-based Complement. Altern. Med.*, vol. 2013, 2013.
- [162] Y. Tariku, A. Hymete, A. Hailu, and J. Rohloff, “Essential-oil composition, antileishmanial, and toxicity study of *Artemisia abyssinica* and *Satureja punctata* ssp. *punctata* from Ethiopia”, *Chem. Biodivers.*, vol. 7, no. 4, pp. 1009–1018, 2010.
- [163] V. D. da Silva, F. Almeida-Souza, A. M. Teles, et al., “Chemical composition of *Ocimum canum* Sims. essential oil and the antimicrobial, antiprotozoal and ultrastructural alterations it induces in *Leishmania amazonensis* promastigotes”, *Ind. Crops Prod.*, vol. 119, no. March, pp. 201–208, 2018.
- [173] K. A. F. Rodrigues, L. V. Amorim, C. N. Dias, et al., “*Syzygium cumini* (L.) Skeels essential oil and its major constituent  $\alpha$ -pinene exhibit anti-*Leishmania* activity through immunomodulation *in vitro*”, *J. Ethnopharmacol.*, vol. 160, pp. 32–40, 2015.
- [175] A. Bouyahya, A. Et-Touys, J. Abrini, et al., “*Lavandula stoechas* essential oil from Morocco as novel source of antileishmanial, antibacterial and antioxidant activities”, *Biocatal. Agric. Biotechnol.*, vol. 12, no. July, pp. 179–184, 2017.
- [178] R. Essid, F. Z. Rahali, K. Msaada, et al., “Antileishmanial and cytotoxic potential of essential oils from medicinal plants in Northern Tunisia”, *Ind. Crops Prod.*, vol. 77, pp. 795–802, 2015.
- [194] P. Escobar, S. M. Leal, L. V. Herrera, J. R. Martinez, and E. Stashenko, “Chemical composition and antiprotozoal activities of Colombian *Lippia* spp essential oils and their major components”, *Mem. Inst. Oswaldo Cruz*, vol. 105, no. 2, pp. 184–190, 2010.

- [204] F. L. Neira, E. Stashenko, and P. Escobar, "Actividad antiparasitaria de extractos de plantas colombianas de la familia Euphorbiaceae", *Rev. la Univ. Ind. Santander.*, vol. 46, no. 1, pp. 15–22, 2014.
- [208] J. O. de Melo, T. A. Bitencourt, A. L. Fachin, et al., "Antidermatophytic and antileishmanial activities of essential oils from *Lippia gracilis* Schauer genotypes", *Acta Trop.*, vol. 128, no. 1, pp. 110–115, 2013.
- [237] J. R. A. Silva, D. M. F. Carmo, E. M. Reis, et al., "Chemical and biological evaluation of essential oils with economic value from lauraceae species", *J. Braz. Chem. Soc.*, vol. 20, no. 6, pp. 1071–1076, 2009.
- [238] M. D. Medeiros, A. C. Silva, A. M. Citó, et al., "*In vitro* antileishmanial activity and cytotoxicity of essential oil from *Lippia sidoides* Cham", *Parasitol. Int.*, vol. 60, no. 3, pp. 237–241, 2011.
- [239] H. C. R. M. F. C. M. Rondon; C. M. L. Bevilaqua, M. P. Accioly, S. M. Morais, H. F. Andrade-Júnior, C. A. Carvalho, J. C. Lima, "In vitro efficacy of *Coriandrum sativum*, *Lippia sidoides* and *Copaifera reticulata* against *Leishmania chagasi*", *Rev. Bras. Parasitol. Vet., Jaboticabal*, vol. 21, no. 3, pp. 185–191.
- [240] J. Mikus, M. Harkenthal, D. Steverding, and J. Reichling, "In vitro effect of essential oils and isolated mono-and sesquiterpenes on *Leishmania major* and *Trypanosoma brucei*", *Planta Med.*, vol. 66, pp. 66–68, 2000.
- [241] L. M. Fidalgo, I. S. Ramos, A. M. M. Álvarez, N. G. Lorente, R. S. Lizama, and J. A. Payrol, "Propiedades antiprotozoarias de aceites esenciales extraídos de plantas cubanas", *Rev. Cubana Med. Trop.*, vol. 56, no. 3, pp. 230–233, 2004.
- [242] M. García, R. Scull, P. Satyal, W. N. Setzer, and L. Monzote, "Chemical Characterization, Antileishmanial Activity, and Cytotoxicity Effects of the Essential Oil from Leaves of *Pluchea carolinensis* (Jacq.) G. Don. (Asteraceae)", *Phyther. Res.*, vol. 31, no. 9, pp. 1419–1426, 2017.
- [243] N. A. Parreira, L. G. Magalhães, D. R. Morais, et al., "Antiprotozoal, Schistosomicidal, and Antimicrobial Activities of the Essential Oil from the Leaves of *Baccharis dracunculifolia*", *Chem. Biodivers.*, vol. 7, no. 4, pp. 993–1001, 2010.
- [244] M. Machado, G. Santoro, M. C. Sousa, L. Salgueiro, and C. Cavaleiro, "Activity of essential oils on the growth of *Leishmania infantum* promastigotes", *Flavour Fragr. J.*, vol. 25, no. 3, pp. 156–160, 2010.
- [245] C. A. T. Siqueira, J. Oliani, A. Sartoratto, et al., "Chemical constituents of the volatile oil from leaves of *Annona coriacea* and *in vitro* antiprotozoal activity", *Brazilian J. Pharmacogn.*, vol. 21, no. 1, pp. 33–40, 2011.

- [246] V. C. S. Oliveira, D. M. S. Moura, J. A. D. Lopes, P. P. De Andrade, N. H. Da Silva, and R. C. B. Q. Figueiredo, "Effects of essential oils from *Cymbopogon citratus* (DC) Stapf., *Lippia sidoides* Cham., and *Ocimum gratissimum* L. on growth and ultrastructure of *Leishmania chagasi* promastigotes", *Parasitol. Res.*, vol. 104, no. 5, pp. 1053–1059, 2009.
- [247] M. Machado, A. M. Dinis, M. Snatos-Rosa, et al., "Activity of *Thymus capitellatus* volatile extract, 1,8-cineole and borneol against *Leishmania* species", *Vet. Parasitol.*, vol. 200, no. 1–2, pp. 39–49, 2014.
- [248] C. N. Dias, K. A. Rodrigues, F. A. Carvalho, et al., "Molluscicidal and leishmanicidal activity of the leaf essential oil of *Syzygium cumini* (L.) Skeels from Brasil", *Chem. Biodivers.*, vol. 10, pp. 1133–1141, 2013.
- [249] K. Z. Bernuci, C. C. Iwanaga, C. M. Fernandez-Andrade, et al., "Evaluation of chemical composition and antileishmanial and antituberculosis activities of essential oils of *Piper* species", *Molecules*, vol. 21, no. 12, p. 12, 2016.
- [250] L. F. Ceole, M. D. G. Cardoso, and M. J. Soares, "Nerolidol, the main constituent of *Piper aduncum* essential oil, has anti-*Leishmania braziliensis* activity", *Parasitology*, vol. 144, no. 9, pp. 1–12, 2017.
- [251] M. L. A. S. V. R. Esperandim, D. S. Ferreira, K. C. S. Rezende, L. G. Magalhães, J. M. Souza, P. M. Pauletti, A. H. Januário, R. S. Laurentz, J. K. Bastos, G. V. Símaro, and W. R. Cunha, "Chemical composition and antiprotozoal activities of Colombian *Lippia* spp essential oils and their major components", *Planta Med.*, vol. 79, p. 1653, 2013.
- [252] Y. Gutiérrez, R. Montes, R. Scull, et al., "Chemodiversity Associated with Cytotoxicity and Antimicrobial Activity of *Piper aduncum* var. *ossanum*", *Chem. Biodivers.*, vol. 13, no. 12, pp. 1715–1719, 2016.
- [253] S. M. Leal, N. Pino, E. E. Stashenko, J. R. Martínez, and P. Escobar, "Antiprotozoal activity of essential oils derived from *Piper* spp. grown in Colombia", *J. Essent. Oil Res.*, vol. 25, no. 6, pp. 512–519, 2013.
- [254] A. M. Marques, A. L. S. B. Barreto, J. A. da R. Curvelo, M. T. V. Romanos, R. M. d. A. Soares, and M. A. C. Kaplan, "Antileishmanial activity of nerolidol-rich essential oil from *Piper claussonianum*", *Brazilian J. Pharmacogn.*, vol. 21, no. 5, pp. 908–914, 2011.
- [255] L. Monzote, M. García, A. M. Montalvo, R. Scull, and M. Miranda, "Chemistry, cytotoxicity and antileishmanial activity of the essential oil from *Piper auritum*", *Mem. Inst. Oswaldo Cruz*, vol. 105, no. 2, pp. 168–173, 2010.
- [256] P. A. Farias-Junior, M. C. Rios, T. A. Moura, et al., "Leishmanicidal activity of carvacrol-rich essential oil from *Lippia sidoides* Cham.", *Biol. Res.*, vol. 45, no. 4, pp. 399–402, 2012.

- [257] C. E. Carvalho, E. P. Sobrinho-Junior, L. M. Brito, et al., "Anti-*Leishmania* activity of essential oil of *Myracrodruon urundeuva* (Engl.) Fr. All.: Composition, cytotoxicity and possible mechanisms of action", *Exp. Parasitol.*, vol. 175, pp. 59–67, 2017.
- [258] E. H. Ramos, M. M. Moraes, L. L. Nerys, et al., "Chemical composition, leishmanicidal and cytotoxic activities of the essential oils from *Mangifera indica* L. var. *Rosa* and *Espada*.", *Biomed Res. Int.*, vol. 2014, p. 734946, 2014.
- [259] L. Monzote, M. García, A. M. Montalvo, R. Scull, M. Miranda, and J. A. Payrol, "*In Vitro* Activity of an Essential Oil against *Leishmania donovani*", *Phyther. Res.*, vol. 22, no. April 2008, pp. 557–559, 2009.
- [260] M. Machado et al., "Monoterpenic aldehydes as potential anti-*Leishmania* agents: Activity of *Cymbopogon citratus* and citral on *L. infantum*, *L. tropica* and *L. major*", *Exp. Parasitol.*, vol. 130, no. 3, pp. 223–231, 2012.
- [261] M. D. Medeiros, A.C. Silva A. M. Citó, et al., "*In vitro* antileishmanial activity and cytotoxicity of essential oil from *Lippia sidoides* Cham.", *Parasitol. Int.* vol. 60, pp. 237–241, 2011.
- [262] V. D. Zheljazkov, C. L. Cantrell, B. Tekwani, and S. I. Khan. "Content, Composition, and Bioactivity of the Essential Oils of Three Basil Genotypes as a Function of Harvesting", *J. Agric. Food Chem*, vol. 56, pp. 380–385, 2008.
